# Supplementary material for: Reading on smartphone causes sigh inhibition with brain overactivity and comprehension decline
Source: Research Square preprint supplement (doi:10.21203/rs.3.rs-333878/v1), 2021-03-23
Supplement: Supplementary file 1 [file 80c1895d11cd0f1f17380a29.xlsx]

## Sheet: Sheet1
SubNo	Age	Sex	Hand		Trial	Viewing distance (cm)	Reading duration (s)	Medium	Novel sentence	Score of Reading		Sigh pre	Sigh read	Sigh post		Minute ventilation pre	Minute ventilation read	Minute ventilation post		Respiratory frequency pre	Respiratory frequency read	Respiratory frequency post		Tidal volume pre	Tidal volume read	Tidal volume post		Inspiratory time pre	Inspiratory time read	Inspiratory time post		Expiratory time pre	Expiratory time read	Expiratory time post		O2 consumption pre	O2 consumption read	O2 consumption post		End tidal CO2 pre	End tidal CO2 read	End tidal CO2 post			ch1-oxhb pre	ch1-oxhb read	ch1-oxhb post		ch2-oxhb pre
S01	22	f	r		1	24	570	s	a	5		0	1	1		6.94595	5.9078	6.36842		19.4351	23.3252	19.4579		364.622	258.908	334.474		1.46622	1.16876	1.45947		1.73108	1.45482	1.76289		157.568	117.578	147.316		5.05649	4.67518	5.23237			0.00956429	0.0186988	0.0180589		0.00557592
S02	20	f	r		1	28	410	p	b	9		1	5	2		4.52424	6.1913	5.65429		16.6848	20.3217	18.5171		275	304.304	312.629		1.53121	1.19659	1.33943		2.1303	1.78514	2.01086		128.455	155.188	140		5.79879	5.65594	5.61714			0.00042975	0.0118213	0.00796542		0.00183983
S03	22	m	r		1	22	347	s	b	7		0	1	4		4.15833	4.18649	4.50541		18.2639	19.345	19.3973		227.889	215.919	237.351		1.2525	1.19369	1.16027		2.06361	1.94027	2.08459		248.82	260.22	262.63		5.73	5.447	5.565			0.000234917	0.0110775	0.0115829		-0.00523658
S04	22	m	r		1	20	317	p	a	10		1	10	2		7.11842	7.09623	7.19474		19.3526	20.3434	19.7632		373.289	347.594	368.5		1.10158	1.10236	1.16026		2.08079	1.91028	1.95579		151.053	142.377	137.132		5.49289	5.4483	5.21263			0.00231479	0.003187	0.00307076		0.0153061
S05	21	f	r		1	22	415	s	a	8		5	5	5		2.76	3.58602	4.28571		10.585	13.7935	15.3714		259.1	258.312	278.786		2.098	1.7429	1.45571		3.87	2.73269	2.70357		231.193	216.268	228.676		5.6235	5.5428	5.4			-0.00246821	0.00737572	0.00252396		-0.00768642
S06	21	f	r		1	25	418	p	b	10		3	8	3		7.88182	9.36495	8.1		11.3455	14.3052	11.6636		687.318	653.175	720.227		1.83136	1.4101	1.72727		3.65727	2.88227	3.82727		257.045	264.155	244.5		6.45591	6.1566	6.23227			-0.00578479	0.00226063	-0.00427079		-0.00188542
S07	20	f	r		1	25	399	s	b	8		0	2	2		7.55588	7.50248	8.77857		17.7265	18.1719	18.7929		427.059	413.521	466.929		1.26794	1.25736	1.1875		2.17412	2.06736	2.02714		192.824	183.529	209.78		6.11559	6.1905	6.13321			0.00270278	0.00817793	0.01118		0.00869315
S08	20	f	r		1	27	313	p	a	8		1	3	2		5.68571	4.87647	4.31481		17.8	16.6635	14.637		321.971	297.718	319.074		1.40314	1.41388	1.66444		2.00829	2.26353	2.64259		141.114	123.012	113.222		5.71086	5.82659	5.6337			0.0161096	0.022727	0.0328542		0.00199092
S09	19	f	r		1	20	299	s	a	8		0	1	5		4.59231	6.38169	6.215		12.0462	14.6239	11.39		396.923	436.197	593.25		1.60154	1.43183	1.9785		3.505	2.80394	3.6055		128.692	170.282	170.25		5.55769	5.53507	5.389			-0.00075825	0.0224501	0.0146583		0.0298557
S10	19	f	r		1	20	565	p	b	10		2	5	5		4.93103	7.12341	6.40571		14.9552	22.2322	18.4657		337.828	324.098	351.343		1.78207	1.0218	1.334		2.46655	1.73746	1.97971		152.448	174.341	172		5.76345	5.44473	5.54657			0.00217625	-0.00032569	-0.0086655		0.00213162
S11	20	f	r		1	23	256	s	b	7		2	1	2		7.62647	7.91786	8.26486		17.3853	18.7512	19.3108		439.088	428.524	435.811		1.32853	1.20702	1.20189		2.19059	2.0344	2.02973		165.147	153.214	159.865		5.53059	5.57952	5.39162			0.00548492	0.0154484	0.0125916		0.00163742
S12	19	f	r		1	28	397	p	a	10		0	1	1		6.76154	6.18351	7.40769		13.3885	15.0041	13.8654		515.692	417.526	556.654		1.49846	1.60144	1.70885		3.15654	2.52247	2.92462		238.64	212.34	192.26		6.04483	5.79732	5.89706			-0.0016925	-0.0139694	-0.0212475		0.0157472
S13	22	m	l		1	15	421	s	a	5		0	0	2		7.67931	8.25932	8.45714		15.3862	17.1958	18.5143		517.966	482.839	498.914		1.61966	1.43458	1.31886		2.54828	2.11788	2.19543		215.448	210.169	210.114		6.17138	6.1689	6.09371			0.0281986	0.0338401	0.0289222		0.0299449
S14	20	m	r		1	24	348	p	b	9		4	3	4		9.29655	10.3434	9.68485		16.3276	19.8239	16.8121		584.552	530.54	582.879		1.56	1.28991	1.41697		2.26552	1.79982	2.23303		248.448	260.212	262.364		6.07034	6.03814	6.08091			0.00575321	0.011764	0.0110937		0.0182123
S15	22	m	r		1	22	300	s	b	7		0	1	0		9.20811	9.56412	9.7175		18.6811	20.3458	21.0025		501.568	473.962	469.65		1.27892	1.16328	1.099		2.04108	1.83237	1.84025		214.343	234.815	241.25		5.16892	5.24672	5.1585			0.00561854	0.0130184	0.0177288		0.00386375
S16	20	f	r		1	22	382	p	a	8		1	2	1		7.53793	8.39643	8.02059		14.9621	17.7429	14.8382		502.828	478.027	549.559		1.42138	1.19661	1.41059		2.61828	2.23714	2.75735		231.93	226.279	229.764		6.00448	5.70973	5.84971			0.00629967	0.0147972	0.0124467		0.0170031
S17	20	m	r		1	27	350	s	a	7		2	3	3		5.16774	4.63905	5.95806		17.2194	18.5038	17.3194		332.903	265.152	377.323		1.73806	1.562	1.75677		2.00516	1.83933	2.01387		124.452	107.124	140.677		5.51548	5.70105	5.81548			0.00296046	0.00853781	0.00346		0.0103799
S18	20	m	r		1	20	256	p	b	10		2	6	2		7.24063	7.34359	7.73902		16.4762	18.6532	20.0268		425.976	389.545	383.089		1.38167	1.25026	1.27786		2.48381	2.08078	1.83857		163.048	166.143	162.625		5.81857	5.72688	5.43625			-0.00255521	-0.00575382	0.00347213		-0.00294458
S19	23	f	r		1	24	340	s	b	8		2	0	1		6.89706	7.3045	7.68333		17.9971	19.7225	18.5611		398.088	381.568	423.25		1.21971	1.21739	1.28806		2.24735	1.88099	1.99306		198.559	205.135	210.472		5.07618	5.20207	5.26194			-0.00311671	0.00634019	0.00580604		-0.00304917
S20	20	f	r		1	19	490	p	a	9		3	3	3		8.04194	9.81829	10.2865		16.7968	20.3073	19.8		491.29	488.091	552.865		1.22935	1.06707	1.12243		2.5129	1.9475	2.10838		115.811	109.212	100.25		5.61724	5.61	5.685			0.00658687	0.00985368	0.017262		0.00451454
S21	19	f	r		1	22	430	s	a	8		0	1	1		7.17895	5.03529	5.42973		19.3974	19.2779	18.4216		368.474	261.625	295.973		1.19395	1.29478	1.37216		1.97026	1.85449	1.92595		214.324	234.802	241.325		4.22	4.594	4.46			0.00486671	0.0115161	0.00912283		0.00502263
S22	19	m	r		1	28	492	p	b	10		1	4	5		6.45588	5.15782	6.92903		17.8118	18.6898	16.7935		365.647	283.102	413.516		1.31118	1.40388	1.43774		2.17853	1.95605	2.27645		156.471	133	183.226		6.29265	6.35762	6.38774			0.002857	0.00343544	0.0117506		0.00178854
S23	20	f	r		1	22	491	s	b	5		0	1	5		8.38286	9.07451	9.52895		18.0314	19.1784	19.5105		472.543	476.248	490.684		1.19771	1.13621	1.06789		2.26571	2.07542	2.06447		207.143	206.327	206.289		5.39886	5.35307	5.28763			0.0123541	0.0292514	0.0134271		0.00151475
S24	19	m	r		1	20	310	p	a	9		2	5	3		9.31471	9.07674	8.93824		17.4647	16.7128	17.0559		537.353	543.105	531		1.26912	1.34779	1.29676		2.21941	2.26	2.28324		234.676	247.907	225.5		5.64853	5.88884	5.73912			0.00341183	0.00691868	-0.00699312		0.00867329
S25	20	m	r		1	21	420	s	a	8		0	0	1		5.86216	5.6855	6.43784		19.0243	18.8458	19.2243		310.703	300.695	336.811		1.34243	1.2471	1.30378		1.84351	1.98214	1.87189		135.432	126.695	143.135		5.72514	5.72443	5.60568			0.0202878	0.0393762	0.025925		0.00773358
S26	21	f	r		1	22	347	p	b	10		1	4	2		7.28571	7.17459	7.65814		21.3167	21.5664	21.807		348.31	337.221	359.209		1.01571	1.07033	1.03209		1.86333	1.76254	1.79605		142.571	128.303	127.093		4.25214	4.51943	4.42628			-0.000748833	0.00606247	-0.000504417		-0.006263
S27	20	f	r		1	19	283	s	b	8		1	0	2		5.32647	2.32449	2.37692		17.6618	16.9796	14.5808		306.176	137.551	168.038		1.64412	2.5351	2.45		1.94971	1.68622	2.21346		129	44.3367	51.3846		5.49029	4.71592	4.87			0.00355229	0.0144619	0.0143967		-0.000877875
S28	20	m	r		1	20	325	p	a	7		1	0	2		8.10345	8.81333	8.91111		14.9276	17.1333	14.8074		540.517	531.333	631.519		1.53828	1.34867	1.95185		2.54034	2.28456	2.43741		219.138	226.367	254.185		5.61034	5.58233	5.57963			0.0156745	0.0274095	0.0739692		0.00394221
S29	20	f	l		1	28	466	s	a	10		5	4	4		5.29714	5.08312	5.36154		17.6543	19.6935	19.4154		306.457	259.149	276.923		1.34686	1.3561	1.31949		2.17714	1.73753	1.80128		115.8	109.201	100.026		5.72257	5.51383	5.56744			-0.00136654	0.00981678	-0.004824		0.00390638
S30	19	f	r		1	19	314	p	b	8		1	3	3		7.60645	8.68365	8.07632		16.0258	19.9788	19.7737		482.839	439.144	407.947		1.45516	1.20827	1.20237		2.43742	1.82356	1.89579		176.845	194.073	188.41		5.95129	5.96048	5.88316			0.0122278	0.0103256	0.00976617		0.0171193
S31	22	m	r		1	23	362	s	b	9		1	0	1		8.83409	8.57929	8.96667		22.4636	21.4157	21.6286		400.75	400.864	414.881		1.12955	1.1825	1.1619		1.60591	1.6705	1.66238		217.545	213.293	222.071		5.83977	5.989	5.99262			0.0177791	0.016468	0.0197847		0.0193252
S32	21	m	r		1	18	545	p	a	8		1	3	5		6.87931	7.83779	6.92222		14.6207	18.9814	14.7667		483	414.215	522.407		1.62414	1.22506	1.70407		2.57793	1.95041	2.78667		172.655	171.128	167.926		5.62172	5.61715	5.61852			0.0166111	0.0166142	0.0130061		0.0180242
S33	21	m	r		1	20	247	s	a	7		1	1	5		6.68056	7.49634	6.70556		18.4611	20.0634	17.8111		362.944	378.622	375.25		1.24222	1.19549	1.25611		2.05917	1.81927	2.14194		184.083	179.098	178.778		5.24278	5.07744	5.21306			0.0108394	0.0298627	0.0379167		0.00570337
S34	20	m	r		1	22	305	p	b	10		3	10	7		6.35833	4.28932	8.12571		18.8139	17.1767	18.1		340.389	250.252	448.686		1.33222	1.49602	1.28886		1.93861	2.07078	2.09714		133.222	80.7864	175.571		5.27472	5.28922	5.52886			-0.00726383	0.00436014	0.00287458		8.95417e-05
S01	22	f	r		2	25	488	p	b	9		0	1	4		4.8625	6.59485	6.54474		16.2281	23.3299	19.8447		304.156	289.933	340.632		1.83813	1.15402	1.41289		1.91375	1.4768	1.70658		109.25	131.144	142.579		5.05813	4.88113	5.11158			-0.0080932	-0.0120334	-0.0136684		0.00767627
S02	20	f	r		2	28	390	s	a	10		2	3	3		4.97742	5.84868	5.24062		15.7065	21.0921	16.5844		318.032	278.954	318.75		1.69194	1.19053	1.55219		2.22548	1.69066	2.11594		152.29	146.125	142.781		5.81452	5.46414	5.66			-0.00198508	0.00630526	0.00372313		-0.008198
S03	22	m	r		2	22	282	p	a	10		1	2	2		4.0775	4.20488	4.73429		19.5675	19.9919	22.2314		219.125	211.732	231.943		1.19025	1.19569	1.17257		2.0685	1.86959	1.742		238.665	212.014	192.632		5.767	5.62105	5.85321			2.11954e-05	0.0107277	-0.0240078		-0.0277745
S04	22	m	r		2	19	368	s	b	7		2	6	2		7.15581	7.14336	7.75476		21.8977	18.9257	22.0452		327.14	377.327	361.857		1.08814	1.23673	1.14262		1.69628	2.02416	1.70595		145.14	139.894	153.143		5.16581	5.36531	5.0331			8.125e-06	0.00216949	0.00215746		0.00088475
S05	21	f	r		2	20	380	p	b	9		4	11	3		3.648	2.81757	4.22069		13.592	12.0014	15.4621		258.76	233.405	273.724		1.764	2.17	1.51345		2.9828	2.97973	2.56862		231.793	226.268	229.676		5.43	5.58365	5.51897			0.00268254	0.00526197	0.00728058		0.00149017
S06	21	f	r		2	24	390	s	a	7		3	2	4		8.17037	8.76782	7.8		13.5444	13.8908	13.4346		604.407	644.908	616.462		1.51185	1.43943	1.68308		3.03889	3.02931	3.02346		226.519	249.586	214.231		6.12296	6.12517	5.85423			0.003288	0.0121969	-0.00834817		-0.00295546
S07	20	f	r		2	30	415	p	a	9		1	3	3		8.07647	8.07521	8.46944		17.0588	17.7099	17.975		473	460.174	482.417		1.34324	1.29496	1.35056		2.20059	2.1257	2.07472		204.353	195.099	204.806		6.18265	6.09281	6.07056			0.00142796	0.00714385	0.00383963		-0.007312
S08	20	f	r		2	25	272	s	b	7		0	0	2		4.62333	4.18816	4.39643		15.9267	16.9645	14.9036		297.133	252.276	304.179		1.49367	1.42974	1.67429		2.44433	2.18618	2.60964		120.6	98.9474	118.786		5.78	5.6	5.84			0.00273354	0.0123744	-0.00176508		0.00296754
S09	19	f	r		2	20	300	p	b	8		1	3	5		4.3875	5.91368	7.6		11.9583	13.9474	18.6286		372.458	428.747	405.429		1.955	1.48442	1.27429		3.1775	2.96305	2.01857		118.667	158.347	191.857		5.31125	5.38842	5.08571			0.00839321	0.00377008	-0.00362396		-0.0001585
S10	19	f	r		2	25	563	s	a	7		1	1	3		7.87381	8.23515	8.73421		21.15	21.8941	19.4684		381.238	380.733	466.5		1.15857	1.0447	1.25526		1.73667	1.74931	1.92026		211.857	212.619	230.842		5.37857	5.4049	5.50316			0.0130912	0.0186152	0.015875		0.0217423
S11	20	f	r		2	23	291	p	a	10		2	3	2		8.25789	7.52857	8.07838		19.8842	19.7416	19.4973		421.105	383.494	419.432		1.20447	1.14558	1.20378		1.94237	1.93286	2.00405		162.132	138.416	152.649		5.46474	5.47675	5.38838			0.0166259	0.0125454	0.00966208		0.0193786
S12	19	f	r		2	22	440	s	b	6		1	2	1		6.99643	6.14602	7.21111		14.9571	15.7106	14.4926		507.893	394.681	534.259		1.89786	1.64416	1.78148		2.51536	2.26389	2.68481		167.25	135.097	169.926		5.77	5.605	5.83			-0.000594208	0.00919297	0.000185417		0.000342
S13	22	m	l		2	20	362	p	b	8		0	0	3		7.45862	8.44762	8.24687		15.5448	17.4371	16.375		497.448	485.657	521.75		1.54931	1.41695	1.41187		2.50483	2.04743	2.33844		195.793	224.048	214.062		5.93793	6.02895	6.055			0.00483038	0.0159015	0.00897058		0.00997758
S14	20	m	r		2	22	295	s	a	6		3	2	4		8.90588	10.4008	8.7129		16.9971	20.4739	16.7839		538.706	511.034	580.29		1.44824	1.24924	1.4229		2.16147	1.71269	2.42677		241.735	266.874	219.645		5.90206	6.07328	5.84484			0.00502158	0.020737	0.0158682		0.00662504
S15	22	m	r		2	17	570	p	a	10		2	3	1		7.77429	8.83692	9.70976		17.6143	20.4123	20.7073		461.571	438.608	471.171		1.51086	1.18677	1.17951		2.03657	1.79762	1.77561		214.229	217.408	275.01		5.7	5.63	5.86			0.00446746	0.00893956	0.00270925		0.00126363
S16	20	f	r		2	20	381	s	b	9		1	2	1		7.28065	8.22185	7.79667		15.7548	18.7437	15.5333		463.065	441.546	511.9		1.38839	1.1916	1.35667		2.44452	2.04992	2.55667		194.806	210.176	214.133		5.7071	5.52303	5.73867			-0.00349329	0.00846553	-0.00421029		-6.33333e-05
S17	20	m	r		2	26	309	p	b	9		1	6	3		5.35313	3.90267	4.66429		17.0219	17.0907	16.5786		338	247.267	323.464		1.70938	2.3248	2.14214		2.00469	1.824	1.99964		123.656	90.9867	104.643		5.59406	5.4176	5.45143			0.00210509	0.00443415	0.00193004		0.00912221
S18	20	m	r		2	22	285	s	a	7		1	1	4		7.07115	6.84588	6.7746		19.06	20.12	19.51		372.79	337.86	358.05		1.25	1.19	1.3		1.96	1.84	1.9		148	125.96	131.21		5.51	5.37	5.36			0.00383679	0.0210075	0.0159458		-0.00458404
S19	23	f	r		2	24	495	p	a	10		0	1	2		6.71563	6.91842	6.68333		17.0156	18.9638	16.3067		415.75	389.559	430.6		1.38406	1.35053	1.64333		2.29062	1.93125	2.28833		187.469	198.382	191.967		5.20563	5.1248	5.27967			-0.0022495	0.00143604	0.00250796		-0.00214625
S20	20	f	r		2	20	445	s	b	7		1	2	2		7.65937	9.06494	8.19167		17.0312	21.0558	18.5694		460.031	434.909	448.806		1.17781	1.09474	1.20639		2.525	1.81649	2.12361		156.566	154.36	169.13		5.49536	5.57505	5.68037			0.00473125	0.0137982	0.0177237		0.00163575
S21	19	f	r		2	22	389	p	b	8		0	1	1		5.20286	3.74048	5.24324		19.2143	19.4333	18.5054		270.343	193.397	285.216		1.30857	1.35079	1.30243		1.85657	1.76389	1.98081		176.806	194.067	188.421		5.58522	5.32514	5.65324			0.0144874	0.0255836	0.0116828		0.00298954
S22	19	m	r		2	23	480	s	a	7		4	1	7		6.25862	4.92438	5.7963		16.7759	20.525	14.9852		381.931	245.481	411.333		1.80655	1.28619	1.9263		2.25448	1.72263	2.59963		169	122.338	164.741		6.26655	6.07487	6.39222			-0.0243657	0.0262006	-0.0279435		-0.0197401
S23	20	f	r		2	23	497	p	a	8		1	1	2		8.44286	9.42547	9.04167		17.8114	19.8739	19.175		475.057	476.708	491.528		1.21657	1.05634	1.10778		2.25114	2.02963	2.18222		194.657	205.05	188.75		5.42286	5.22516	5.21944			0.00443692	0.0193857	0.012855		0.000996708
S24	19	m	r		2	21	316	s	b	7		0	5	4		8.63235	9.83936	9.28286		17.0294	18.066	17.9486		508.294	546.787	532.029		1.33265	1.26085	1.27		2.22235	2.09043	2.16229		215.029	252.064	227.714		5.60088	5.74798	5.57886			0.00575308	0.00673376	-0.0024595		0.00878929
S25	20	m	r		2	19	435	p	b	8		2	0	1		6.30278	6.57323	5.95833		18.9389	20.3906	20.625		338.417	325.276	288.944		1.53222	1.26055	1.4025		1.7425	1.71299	1.61556		142.972	150.85	133.25		5.415	5.50709	5.45694			0.00159275	0.0270953	0.00167492		-0.00417575
S26	21	f	r		2	24	315	s	a	9		2	3	2		7.11667	7.14035	7.64211		21.181	21.8482	19.9684		342.905	328.219	398		1.03286	1.04912	1.12526		1.87881	1.72307	2.02711		136.69	126.614	133.789		4.22071	4.51114	4.49026			0.00749717	0.0052635	-0.000232458		0.00519596
S27	20	f	r		2	22	289	p	a	6		0	1	3		3.22333	3.20744	2.47692		16.8333	18.5215	15.4615		195.367	175.86	165.269		1.79167	1.57802	2.49		1.91633	1.83165	2.00692		231.605	211.034	182.026		4.84567	4.9605	4.46654			0.0267343	0.030735	0.0350325		0.017486
S28	20	m	r		2	20	329	s	b	5		1	0	2		8.12857	8.53011	7.9963		14.3893	17.2075	13.863		577.643	496.484	583.852		1.63536	1.41946	1.73074		2.72857	2.10387	2.77111		209.179	212.753	224.815		5.39	5.55	5.68			0.0012235	0.0244766	0.00515579		0.00999542
S29	20	f	l		2	22	305	p	b	10		3	5	2		5.22391	5.02991	5.27838		18.8543	21.2103	18.6		278.609	238.43	284.757		1.36522	1.27495	1.30676		1.85696	1.58925	1.97108		108.13	95.9252	106		5.48	5.25	5.65			-0.0038015	0.0042573	0.00412567		-0.00325096
S30	19	f	r		2	19	302	s	a	8		1	2	4		6.31111	6.291	6.7625		17.8417	20.102	17.0656		356.333	318.96	404.062		1.35722	1.2491	1.41719		2.06528	1.7919	2.23563		143.306	130.9	169.375		5.87167	5.6426	5.93906			0.00100025	0.00858003	0.000816042		0.00376079
S31	22	m	r		2	17	399	p	a	8		0	1	2		8.86047	8.80068	8.15		21.1837	22.3789	19.8553		416.791	395.537	417.289		1.20116	1.1366	1.23632		1.67721	1.56503	1.86158		238.605	212.034	192.026		6.0507	5.94	6.05947			0.0147006	0.0231104	0.00628754		0.011027
S32	21	m	r		2	18	557	s	b	10		2	4	5		6.56333	7.19773	6.65769		14.8867	19.104	13.5308		445.3	378.062	515.385		1.571	1.19767	1.80346		2.50633	1.97466	2.84346		156.567	154.307	169.154		5.65667	5.51562	5.81423			-0.0111413	0.00984	-0.00179433		0.00912275
S33	21	m	r		2	20	224	p	b	10		1	4	3		5.98	7.68495	7.34444		17.5714	20.0032	19.3722		340.457	393.075	394.833		1.28543	1.19237	1.205		2.15057	1.87871	2.06389		167.371	180.355	187.361		5.25457	5.03581	5.08472			0.0148615	0.0242485	0.0117103		0.00187213
S34	20	m	r		2	20	426	s	a	8		6	4	7		5.80789	5.81176	7.24324		19.3289	19.5184	19.3703		305.026	298.39	376.757		1.17816	1.35375	1.25135		2.12316	1.77287	1.90649		103.421	113.199	156.595		5.03605	5.31544	5.28946			-0.00379629	0.00729993	-0.00657404		-0.015185
[truncated: 2 more columns]
